# Supplementary material for: Crystal morphology of 3,4-bis(3-nitrofurazan-4-yl)furoxan (DNTF) in a solvent system: molecular dynamics simulation and sensitivity study
Source: Royal Society of Chemistry journal article supplement (doi:10.1039/c6ce00049e), 2016-01-01
Supplement: c6ce00049e1.pdf [file c6ce00049e1.pdf]

## **Supporting Information**

**The crystal morphology of 3,4-bis(3-nitrofurazan-4-yl)furoxan  
(DNTF) in the solvent system: Molecular dynamics simulation and  
sensitivity study**

Ning Liu,\* Ya-nan Li, Svatopluk Zeman, Yuan-jie Shu, Bo-zhou Wang, Yan-shui  
Zhou, Qiang-li Zhao and Wen-liang Wang

Email: flackliu@sina.com

Table S1 The predicted crystal habit parameters of DNTF crystal in vacuum by AE model<sup>a</sup>

| $(h\ k\ l)$ | Multiplicity | $d_{hkl}$ | $E_{att}$<br>(total) | $E_{att}$<br>(vdW) | $E_{att}$<br>(elec) | $D$   | $R_{hkl}$ | Total facet<br>area/% |
|-------------|--------------|-----------|----------------------|--------------------|---------------------|-------|-----------|-----------------------|
| (0 1 1)     | 4            | 8.75      | -48.71               | -44.47             | -4.25               | 48.71 | 1.24      | 42.62                 |
| (0 0 2)     | 2            | 7.55      | -39.14               | -41.03             | 1.89                | 39.14 | 1.00      | 30.24                 |
| (1 0 1)     | 4            | 6.09      | -81.54               | -63.93             | -17.61              | 81.54 | 2.08      | 13.76                 |
| (1 1 0)     | 4            | 5.66      | -83.31               | -66.42             | -16.89              | 83.31 | 2.13      | 9.22                  |
| (1 1 1)     | 8            | 5.30      | -84.42               | -64.10             | -20.33              | 84.42 | 2.16      | 4.16                  |

<sup>a</sup> All energies are in kcal mol<sup>-1</sup>, distances are in Å.

Table S2 The diffusion coefficient of solvent molecules on different DNTF surfaces

| Solvent               | $(h\ k\ l)$ | $D/\times 10^{-10}\ \text{m}^2\ \text{s}^{-1}$ |
|-----------------------|-------------|------------------------------------------------|
| H <sub>2</sub> O/AcOH | (0 0 1)     | 6.66                                           |
|                       | (0 1 1)     | 6.35                                           |
|                       | (1 0 1)     | 5.36                                           |
|                       | (1 1 0)     | 5.51                                           |
|                       | (1 1 1)     | 5.21                                           |
| H <sub>2</sub> O/EtOH | (0 0 1)     | 7.49                                           |
|                       | (0 1 1)     | 6.13                                           |
|                       | (1 0 1)     | 5.72                                           |
|                       | (1 1 0)     | 5.06                                           |
|                       | (1 1 1)     | 5.37                                           |

Table S3 Results of sensitivity for crystallized DNTF

| Samples             | Impact sensitivity, $P/\%$ | Friction sensitivity, $P/\%$ |
|---------------------|----------------------------|------------------------------|
| DNTF 1 <sup>a</sup> | 90                         | 18                           |
| DNTF 2 <sup>b</sup> | 92                         | 60                           |

<sup>a</sup> DNTF crystal cultivating from the solvent of H<sub>2</sub>O/AcOH.

<sup>b</sup> DNTF crystal cultivating from the solvent of H<sub>2</sub>O/EtOH.

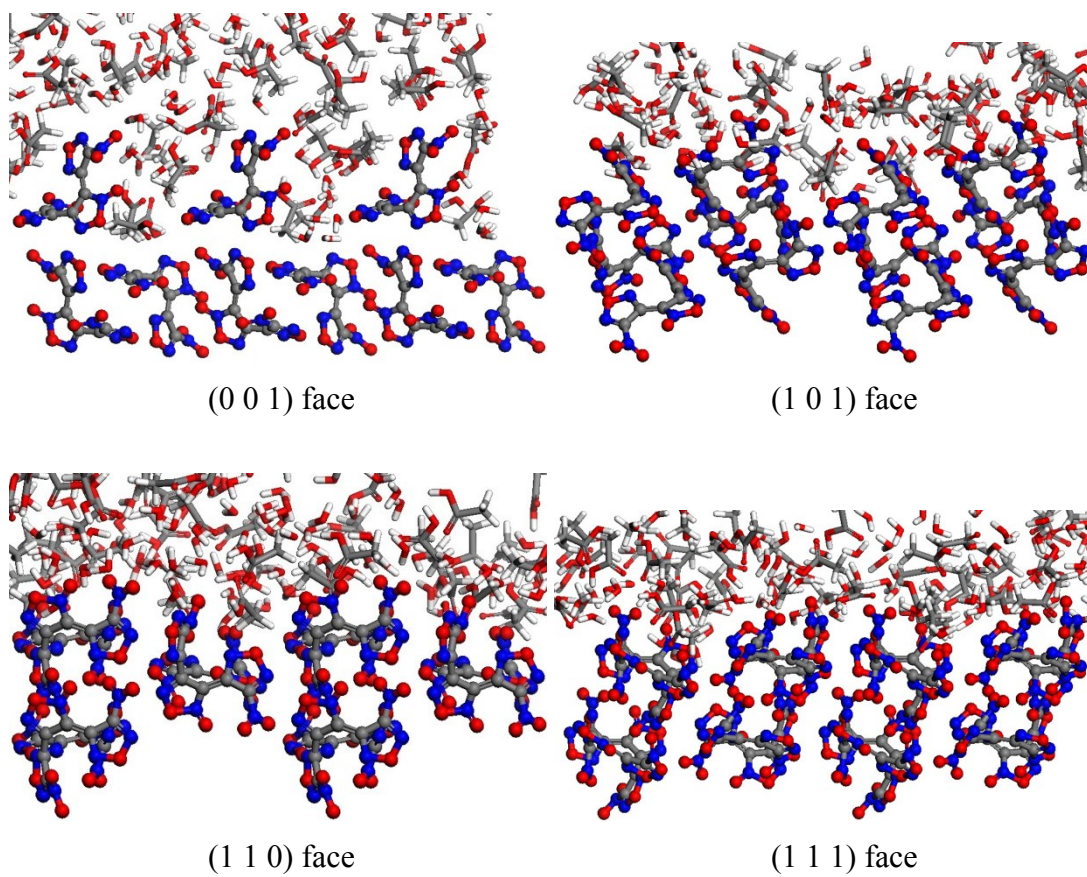

Fig. S1 The configurations of DNTF surface-H<sub>2</sub>O/AcOH interfaces from the MD equilibrium.

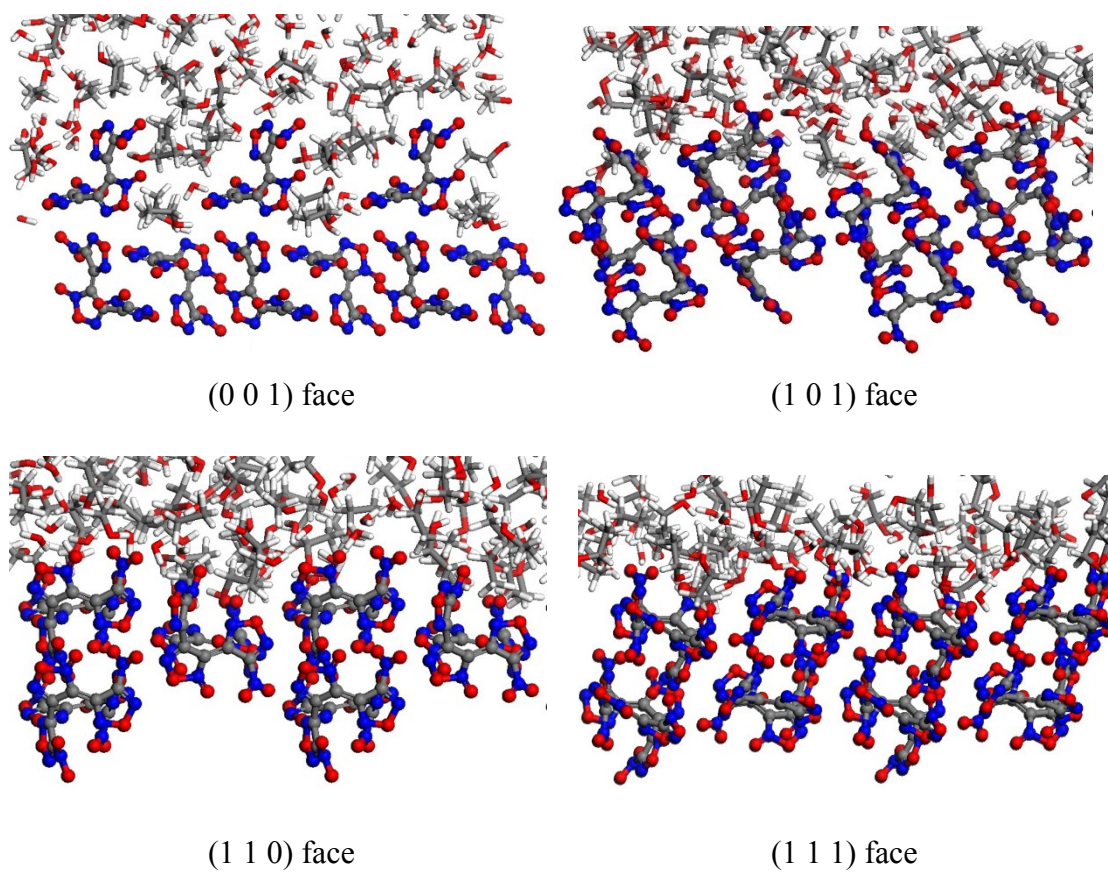

Fig. S2 The configurations of DNTF surface-H<sub>2</sub>O/EtOH interfaces from the MD equilibrium.
